# Supplementary material for: Experimental and Theoretical Investigation of the Photoelectrical Properties of Tetrabromophenol Blue- and Bromoxylenol Blue-Based Solar Cells
Source: Hindawi journal article supplement (doi:10.1155/2018/9720595), 2018-07-22
Supplement: f1 [file 9720595.f1.doc]

**Supporting materials**

Table S1. Calculated transition energy and oscillator strengths in various methods.

| Dye | Gas | | | | | Ethanol | | | | |  |  |
| --- | --- | --- | --- | --- | --- | --- | --- | --- | --- | --- | --- | --- |
|  | State | *E* (eV) | Absorption peak λ(nm) | Contribution MO | Strength *f* | State | *E* (eV) | Absorptiona peak λ(nm) | Contribution MO | Strength *f* | calb | calc |
| Tetrabromophenol blue | S1 | 2.98 | 417 | (0.68595)H→L | 0.0038 | S1 | 3.06 | 404 | (0.66289)H→L | 0.0090 | 314 | 265 |
| S2 | 3.02 | 411 | (0.68130)H-1→L | 0.0072 | S2 | 3.09 | 402 | (0.63663)H-1→L | 0.0022 |  |  |
| S3 | 3.07 | 404 | (0.69343)H→L+1 | 0.0027 | S3 | 3.10 | 399 | (0.61997)H→L+1 | 0.0125 |  |  |
| Bromoxylenol Blue | S1 | 3.28 | 378 | (0.70303)H→L | 0.0092 | S1 | 3.47 | 364 | (0.67228)H→L | 0.0128 | 288 | 248 |
| S2 | 3.32 | 373 | (0.70231)H→L+1 | 0.0069 | S2 | 3.42 | 363 | (0.66998)H-1→L | 0.0036 |  |  |
| S3 | 3.49 | 354 | (0.69784)H-1→L+1 | 0.0093 | S3 | 3.67 | 337 | (0.70192)H→L+1 | 0.0061 |  |  |

(a) Calculation with TD-DFT/PBEPBE/6-311G(d, p); (b) calculation with TD-DFT/B3LYP/6-311G(d, p); (c) calculation with TD-DFT/Cam-B3LYP/6-311G(d, p)

**Table S2** Energy levels of HOMO and LUMO and energy gap (eV).

| Dye | Tetrabromophenol blue | | Bromoxylenol Blue | |
| --- | --- | --- | --- | --- |
| gas | solvent | gas | solvent |
| EHOMO | -6.69 | -6.64 | -6.20 | -6.27 |
| ELUMO | -2.17 | -2.10 | -1.32 | -1.29 |
| gap | -4.52 | -4.54 | -4.88 | -4.98 |

**Table S3** Current-voltage characteristics of Tetrabromophenol blue and Bromoxylenol blue.

| Dye | Voc(V) | Jsc(mA/cm2) | FF% | η |
| --- | --- | --- | --- | --- |
| Tetrabromophenol blue | 0.39 | 0.09 | 0.59 | 0.021 |
| Bromoxylenol blue | 0.25 | 0.05 | 0.51 | 0.007 |

**Table S4** Second order perturbation theory analysis of fock matrix in natural bond orbital for Tetrabromophenol blue.

| Donor | Type | Acceptor | Type | E(2)a | E(j)-E(i)b | F(I, j)c |
| --- | --- | --- | --- | --- | --- | --- |
| C1-C2 | σ | C3 | RY*(1) | 1.85 | 1.91 | 0.053 |
| C1-C2 | σ | C3-C4 | π* | 20.77 | 0.30 | 0.071 |
| C2-C3 | σ | C1-C2 | σ* | 4.26 | 1.26 | 0.066 |
| C3-C4 | σ | C4-C5 | σ* | 5.74 | 1.28 | 0.077 |
| C4-C5 | σ | C3-C4 | σ* | 5.95 | 1.34 | 0.079 |
| C5-Br22 | σ | C3-C4 | σ* | 3.47 | 1.22 | 0.064 |
| C6-Br23 | σ | C1-C2 | σ* | 3.06 | 1.17 | 0.054 |
| C7-O8 | σ | C2-C3 | σ* | 2.26 | 1.37 | 0.050 |
| C8-S9 | σ | C7 | RY*(2) | 0.68 | 1.82 | 0.032 |
| S9-O32 | π | C14-C15 | π* | 23.35 | 0.27 | 0.072 |
| C10-C11 | σ | C8-C9 | σ* | 3.95 | 1.07 | 0.058 |
| C11-C12 | σ | C7-C10 | σ* | 3.80 | 1.11 | 0.058 |
| N12-C13 | π | C14-Br31 | σ* | 4.04 | 0.82 | 0.051 |
| C13-C14 | σ | C12-C13 | σ* | 4.10 | 1.27 | 0.065 |
| C14-C15 | σ | C13 | RY*(2) | 1.44 | 1.69 | 0.044 |
| C15-H35 | σ | C13-C14 | σ* | 4.41 | 1.05 | 0.061 |
| C17-C18 | π | C19-C20 | π* | 22.59 | 0.28 | 0.073 |
| C19-C20 | π | C16-C21 | σ* | 22.77 | 0.31 | 0.075 |
| C20-C21 | σ | C19-C20 | σ* | 3.96 | 1.26 | 0.063 |
| C1-C2 | π* | C3-C4 | π* | 160.11 | 0.02 | 0.084 |
| C19-C20 | π* | C21-C22 | π* | 181.99 | 0.01 | 0.076 |
| C5-C6 | π* | C3-C4 | π* | 152.56 | 0.02 | 0.080 |
| C14-C15 | π* | C10-C11 | π* | 269.58 | 0.01 | 0.083 |
| C17-C18 | π* | C16-C21 | π* | 285.88 | 0.01 | 0.083 |

a: E(2) means energy of hyper conjugative interaction (stabilization energy).

b: Energy difference between donor and acceptor i and j NBO orbitals.

c: F(i,j) is the Fock matrix element between i and j NBO orbitals.

**Table S5** Second order perturbation theory analysis of fock matrix in natural bond orbital for Bromoxylenol blue.

| Donor | Type | Acceptor | Type | E(2)a | E(j)-E(i)b | F(I, j)c |
| --- | --- | --- | --- | --- | --- | --- |
| C1-C2 | σ | C3 | RY*(2) | 0.94 | 1.49 | 0.034 |
| C1-C2 | σ | C1-C6 | σ* | 5.10 | 1.29 | 0.073 |
| C2-C3 | σ | C2-C9 | π* | 2.89 | 1.09 | 0.050 |
| C3-C4 | π | C1-C2 | π* | 24.97 | 0.26 | 0.073 |
| C4-C5 | σ | C5-C6 | σ* | 2.21 | 1.27 | 0.047 |
| C5-C6 | σ | C1-C2 | π* | 20.54 | 0.27 | 0.067 |
| C6-H35 | σ | C1-C2 | σ* | 4.37 | 1.09 | 0.062 |
| S7-O8 | σ | S7-O30 | σ* | 3.35 | 1.07 | 0.055 |
| O8-C9 | σ | C13-C17 | σ* | 0.90 | 1.41 | 0.032 |
| C9-C13 | π | C18-C19 | σ* | 2.38 | 1.19 | 0.048 |
| C10-C11 | σ | C8-C9 | π* | 22.50 | 0.27 | 0.071 |
| C11-C21 | σ | C20-O24 | σ* | 4.26 | 1.05 | 0.060 |
| C12-C14 | π | C15-C16 | π* | 21.62 | 0.30 | 0.073 |
| C13-C17 | π | C12-C14 | π* | 22.88 | 0.27 | 0.072 |
| C14-C15 | σ | C12 | RY*(2) | 1.23 | 1.72 | 0.041 |
| C15-C16 | π | C13-C17 | π* | 23.77 | 0.29 | 0.074 |
| C17-H37 | σ | C12-C13 | σ* | 4.40 | 1.07 | 0.061 |
| C19-C20 | σ | C18-C19 | σ* | 4.21 | 1.29 | 0.066 |
| C20-C21 | σ | C19-C20 | σ* | 4.54 | 1.25 | 0.067 |
| C1-C2 | π* | C3-C4 | π* | 176.83 | 0.02 | 0.084 |
| C12-C14 | π* | C13-C17 | π* | 271.69 | 0.01 | 0.083 |
| C12-C14 | π* | C15-C16 | π* | 246.97 | 0.01 | 0.078 |
| C18-C19 | π* | C10-C11 | π* | 271.65 | 0.01 | 0.083 |
| C18-C19 | π* | C20-C21 | π* | 278.95 | 0.01 | 0.078 |

a: E(2) means energy of hyper conjugative interaction (stabilization energy).

b: Energy difference between donor and acceptor i and j NBO orbitals.

c: F(i,j) is the Fock matrix element between i and j NBO orbitals.
